# Supplementary material
Source: publisher figshare collection journal article supplement (https://karger.figshare.com/ndownloader/files/24439349)
Supplement: Supplementary file 1 [file 24439349]

**Supplemental Table 3. Subgroup analysis for CVD, CVD-related mortality and hypertension risk among women with HDP**

| **Subgroup variables** | **Any CVD**  1.80 (1.67, 1.94), p < 0.001  I2 = 92%, p < 0.001 | **Coronary artery heart disease**  1.66 (1.49, 1.84), p < 0.001  I2 = 86%, p < 0.001 | **Heart failure**  2.87 (2.14, 3.85), p < 0.001  I2 = 90%, p < 0.001 | **Any peripheral vascular disease**  1.60 (1.29, 2.00), p < 0.001  I2 = 76%, p < 0.001 |
| --- | --- | --- | --- | --- |
| **Geographic region** | TSD: χ2 = 16.53, p = 0.000 | TSD: χ2 = 23.38, p = 0.000 | TSD: χ2 = 22.23, p = 0.000 | TSD: χ2 = 2.51, p = 0.113 |
| Asia | 2.30 (1.91, 2.76) (n = 7), p = 0.000;  I2 = 89.7%, p = 0.000 | 4.97 (3.12, 7.92) (n = 2), p = 0.000;  I2 = 76.7%, p = 0.038 | 8.08 (4.48, 14.57) (n = 2), p = 0.000;  I2 = 0%, p = 0.000 | NA |
| Europe | 1.61 (1.47, 1.75) (n = 24), p = 0.000;  I2 = 90.8%, p = 0.000 | 1.61 (1.44, 1.79) (n = 17), p = 0.000;  I2 = 86.2%, p = 0.000 | 1.94 (1.56, 2.42) (n = 6), p = 0.000;  I2 = 70.1%, p = 0.005 | 1.34 (1.07, 1.66) (n = 4), p = 0.010;  I2 = 74.8%, p = 0.008 |
| North America | 2.03 (1.77, 2.32) (n = 11), p = 0.000;  I2 = 80.4%, p = 0.000 | 1.36 (1.02, 1.82) (n = 5), p = 0.036;  I2 = 66.3%, p = 0.018 | 3.13 (2.29, 4.28) (n = 2), p = 0.000;  I2 = 52.4%, p = 0.147 | 1.81 (1.34, 2.45) (n = 3), p = 0.000;  I2 = 0%, p = 0.391 |
| **Sample source** | TSD: χ2 = 22.12, p = 0.000 | TSD: χ2 = 2.14, p = 0.144 | TSD: χ2 = 2.20, p = 0.138 | TSD: χ2 = 9.38, p = 0.002 |
| Hospital-based | 2.54 (2.16, 2.99) (n = 12), p = 0.000;  I2 = 81.4%, p = 0.000 | 1.99 (1.52, 2.60) (n = 7), p = 0.000;  I2 = 82.2%, p = 0.000 | 3.53 (2.36, 5.29) (n = 4), p = 0.000;  I2 = 27.4%, p = 0.247 | 3.05 (1.93, 4.82) (n = 2), p = 0.000;  I2 = 75.6%, p = 0.043 |
| Population-based | 1.66 (1.54, 1.78) (n = 31), p = 0.000;  I2 = 90.8%, p = 0.000 | 1.60 (1.43, 1.80) (n = 18), p = 0.000;  I2 = 87.2%, p = 0.000 | 2.39 (1.74, 3.29) (n = 6), p = 0.000;  I2 = 87.3%, p = 0.000 | 1.41 (1.16, 1.70) (n = 6), p = 0.000;  I2 = 60.7%, p = 0.026 |
| **Type of exposure** | TSD: χ2 = 6.79, p = 0.009 | TSD: χ2 = 7.00, p = 0.008 | TSD: χ2 = 2.70, p = 0.100 | TSD: χ2 = 2.90, p = 0.089 |
| GH | 1.64 (1.43, 1.89) (n = 17), p = 0.000  I2 = 81.6%, p = 0.000 | 1.54 (1.28, 1.85) (n = 12), p = 0.000  I2 = 65.8%, p = 0.001 | 1.86 (1.21, 2.84) (n = 4), p = 0.004  I2 = 65.4%, p = 0.034 | 1.27 (0.90, 1.79) (n = 5), p = 0.177  I2 = 70.5%, p = 0.009 |
| PE | 2.07 (1.86, 2.30) (n = 29), p=0.000  I2 = 85.0%, p = 0.000 | 2.16 (1.82, 2.56) (n = 14), p=0.000  I2 = 71.3%, p = 0.000 | 2.87 (2.14, 3.85) (n = 8), p=0.000  I2 = 84.8%, p = 0.000 | 1.84 (1.43, 2.37) (n = 6), p=0.000  I2 = 49.8%, p = 0.076 |
| **Whether the confounders were adjusted** | TSD: χ2 = 0.80, p = 0.372 | TSD: χ2 = 2.20, p = 0.372 | NA | NA |
| Adjusted | 1.80 (1.63, 1.99) (n = 33), p = 0.000  I2 = 92.7%, p = 0.000 | 1.60 (1.37, 1.86) (n = 19), p = 0.000  I2 = 86.8%, p = 0.000 | NA | NA |
| Unadjusted | 2.01 (1.62, 2.48) (n = 10), p=0.000  I2 = 82.6%, p = 0.000 | 2.06 (1.53, 2.76) (n = 6), p=0.000  I2 = 84.9%, p = 0.000 | NA | NA |
| **Median/mean follow-up time (y)** | TSD: χ2 = 19.74, p = 0.000 | TSD: χ2 = 13.45, p = 0.001 | TSD: χ2 = 13.13, p = 0.001 | TSD: χ2 = 2.18, p = 0.140 |
| ≤10 | 2.64 (2.15, 3.25) (n = 12), p = 0.000;  I2 = 77.9%, p = 0.000 | 3.66 (2.24, 5.98) (n = 3), p = 0.000;  I2 = 74.3%, p = 0.020 | 5.15 (3.39, 7.84) (n = 5), p = 0.000;  I2 = 44.0%, p = 0.129 | 1.82 (1.43, 2.31) (n = 2), p = 0.000;  I2 = 41.8%, p = 0.190 |
| 10-20 | 1.59 (1.43, 1.75) (n = 14), p = 0.000;  I2 = 95.5%, p = 0.000 | 1.55 (1.39, 1.74) (n = 10), p = 0.000;  I2 = 87.8%, p = 0.000 | 1.99 (1.31, 3.03) (n = 3), p = 0.001;  I2 = 93.5%, p = 0.000 | 1.49 (1.33, 1.67) (n = 2), p = 0.000;  I2 = 0%, p = 0.969 |
| ≥20 | 1.68 (1.62, 1.75) (n = 3), p = 0.000;  I2 = 0%, p = 0.470 | 1.99 (1.57, 2.53) (n = 2), p = 0.000;  I2 = 90.5%, p = 0.001 | 1.86 (1.13, 3.09) (n = 2), p = 0.015;  I2 = 79.4%, p = 0.027 | NA |

**Supplemental Table 3. Subgroup analysis for CVD, CVD-related mortality and hypertension risk among women with HDP (*continued*)**

| **Subgroup variables** | **Stroke**  1.72 (1.50, 1.97), p < 0.001  I2 = 81%, p < 0.001 | **CVD-related mortality**  1.78 (1.58, 2.00), p < 0.001  I2 = 77%, p < 0.001 | **Hypertension**  3.16 (2.74, 3.64), p < 0.001  I2 = 98%, p < 0.001 |
| --- | --- | --- | --- |
| **Geographic region** | TSD: χ2 = 24.24, p = 0.000 | TSD: χ2 = 5.61, p = 0.018 | TSD: χ2 = 2.65, p = 0.266 |
| Asia | 5.70 (2.85, 11.37) (n = 2), p = 0.000;  I2 = 0%, p = 0.431 | 2.63 (1.90, 3.65) (n = 2), p = 0.000;  I2 = 34.8%, p = 0.216 | 4.75 (2.87, 7.85) (n = 4), p = 0.000;  I2 = 96.0%, p = 0.000 |
| Europe | 1.47 (1.31, 1.64) (n = 8), p = 0.000;  I2 = 70.0%, p = 0.002 | 1.72 (1.51, 1.96) (n = 13), p = 0.000;  I2 = 75.3%, p = 0.000 | 3.04 (2.52, 3.67) (n = 25), p = 0.000;  I2 = 98.0%, p = 0.000 |
| North America | 2.38 (1.84, 3.07) (n = 4), p = 0.000;  I2 = 55.0%, p = 0.083 | NA | 3.18 (2.23, 4.53) (n = 6), p = 0.000;  I2 = 99.1%, p = 0.000 |
| **Sample source** | NA | TSD: χ2 = 0.08, p = 0.782 | TSD: χ2 = 9.37, p = 0.002 |
| Hospital-based | NA | 1.68 (1.10, 2.58) (n = 2), p = 0.017  I2 = 19.6%, p = 0.265 | 4.99 (3.61, 6.89) (n = 15), p = 0.000  I2 = 35.3%, p = 0.087 |
| Population-based | NA | 1.79 (1.58, 2.03) (n = 15), p=0.000  I2 = 79.8%, p = 0.000 | 2.82 (2.38, 3.34) (n = 20), p=0.000  I2 = 98.9%, p = 0.000 |
| **Type of exposure** | TSD: χ2 = 0.53, p = 0.466 | TSD: χ2 = 0.776, p = 0.378 | TSD: χ2 = 2.05, p = 0.152 |
| GH | 1.62 (1.08, 2.43) (n = 3), p = 0.020  I2 = 0%, p = 0.751 | 1.71 (1.27, 2.29) (n = 5), p = 0.000  I2 = 78.9%, p = 0.001 | 2.75 (2.07, 3.66) (n = 7), p = 0.000  I2 = 98.6%, p = 0.000 |
| PE | 1.92 (1.53, 2.41) (n = 7), p=0.000  I2 = 71.8%, p = 0.002 | 2.02 (1.61, 2.52) (n = 7), p=0.000  I2 = 58.2%, p = 0.026 | 3.54 (2.91, 4.32) (n = 23), p=0.000  I2 = 97.5%, p = 0.000 |
| **Whether the confounders were adjusted** | NA | TSD: χ2 = 1.91, p = 0.167 | TSD: χ2 = 2.89, p = 0.089 |
| Adjusted | NA | 1.87 (1.63, 2.13) (n = 13), p = 0.000  I2 = 73.2%, p = 0.000 | 3.36 (2.87, 3.94) (n = 27), p = 0.000  I2 = 98.5%, p = 0.000 |
| Unadjusted | NA | 1.54 (1.22, 1.95) (n = 4), p=0.000  I2 = 0%, p = 0.678 | 2.51 (1.86, 3.38) (n = 9), p=0.000  I2 = 79.0%, p = 0.000 |
| **Median/mean follow-up time (y)** | TSD: χ2 = 34.62, p = 0.000 | TSD: χ2 = 1.00, p = 0.606 | TSD: χ2 = 12.68, p = 0.002 |
| ≤10 | 3.29 (2.50, 4.32) (n = 4), p = 0.000;  I2 = 21.3%, p = 0.283 | 1.77 (1.23, 2.54) (n = 2), p = 0.002;  I2 = 83.7%, p = 0.013 | 6.49 (4.57, 9.23) (n = 12), p = 0.000;  I2 = 65.0%, p = 0.001 |
| 10-20 | 1.38 (1.27, 1.51) (n = 5), p = 0.000;  I2 = 57.0%, p = 0.054 | 1.66 (1.30, 2.11) (n = 5), p = 0.000;  I2 = 83.9%, p = 0.000 | 3.01 (2.28, 3.97) (n = 10), p = 0.000;  I2 = 99.1%, p = 0.000 |
| ≥20 | NA | 1.94 (1.59, 2.37) (n = 7), p = 0.000;  I2 = 70.7%, p = 0.002 | 3.13 (2.16, 4.54) (n = 7), p = 0.000;  I2 = 99.0%, p = 0.000 |

HDP, hypertensive disorders of pregnancy; CVD, cardiovascular disease; GH, gestational hypertension; PE, pre-eclampsia; NA, not applicable; TSD, test for subgroup differences.
